# Supplementary figures and images for: Tunable crystalline structure and electrical properties of (Pb,Sr)TiO3 films grown by liquid phase epitaxy
Source: Royal Society of Chemistry journal article supplement (doi:10.1039/d3ce00020f), 2023-01-01

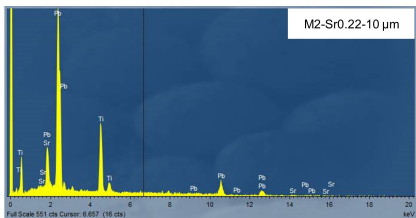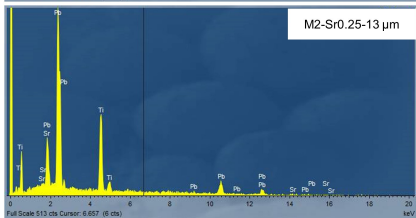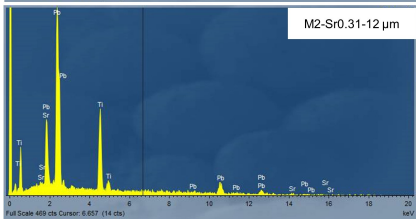

Supplement: d3ce00020f1.pdf [file d3ce00020f1.pdf]

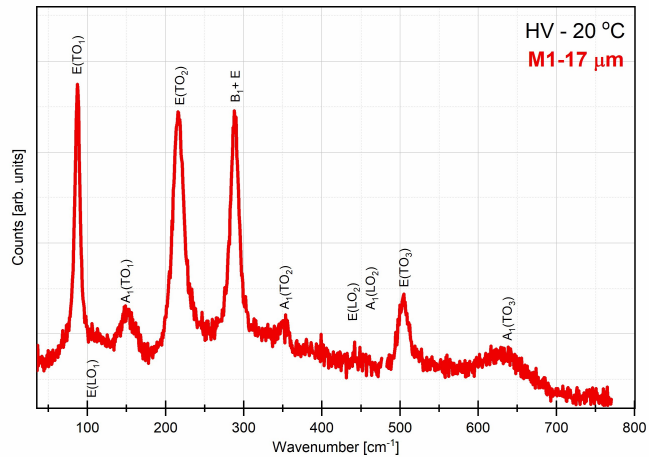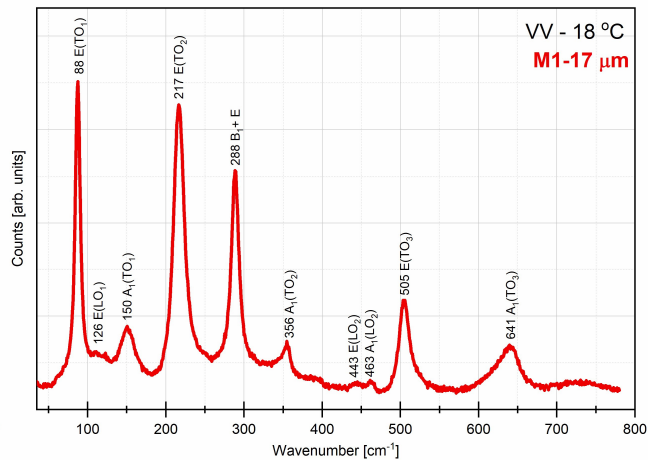

Supplement: d3ce00020f2.pdf [file d3ce00020f2.pdf]

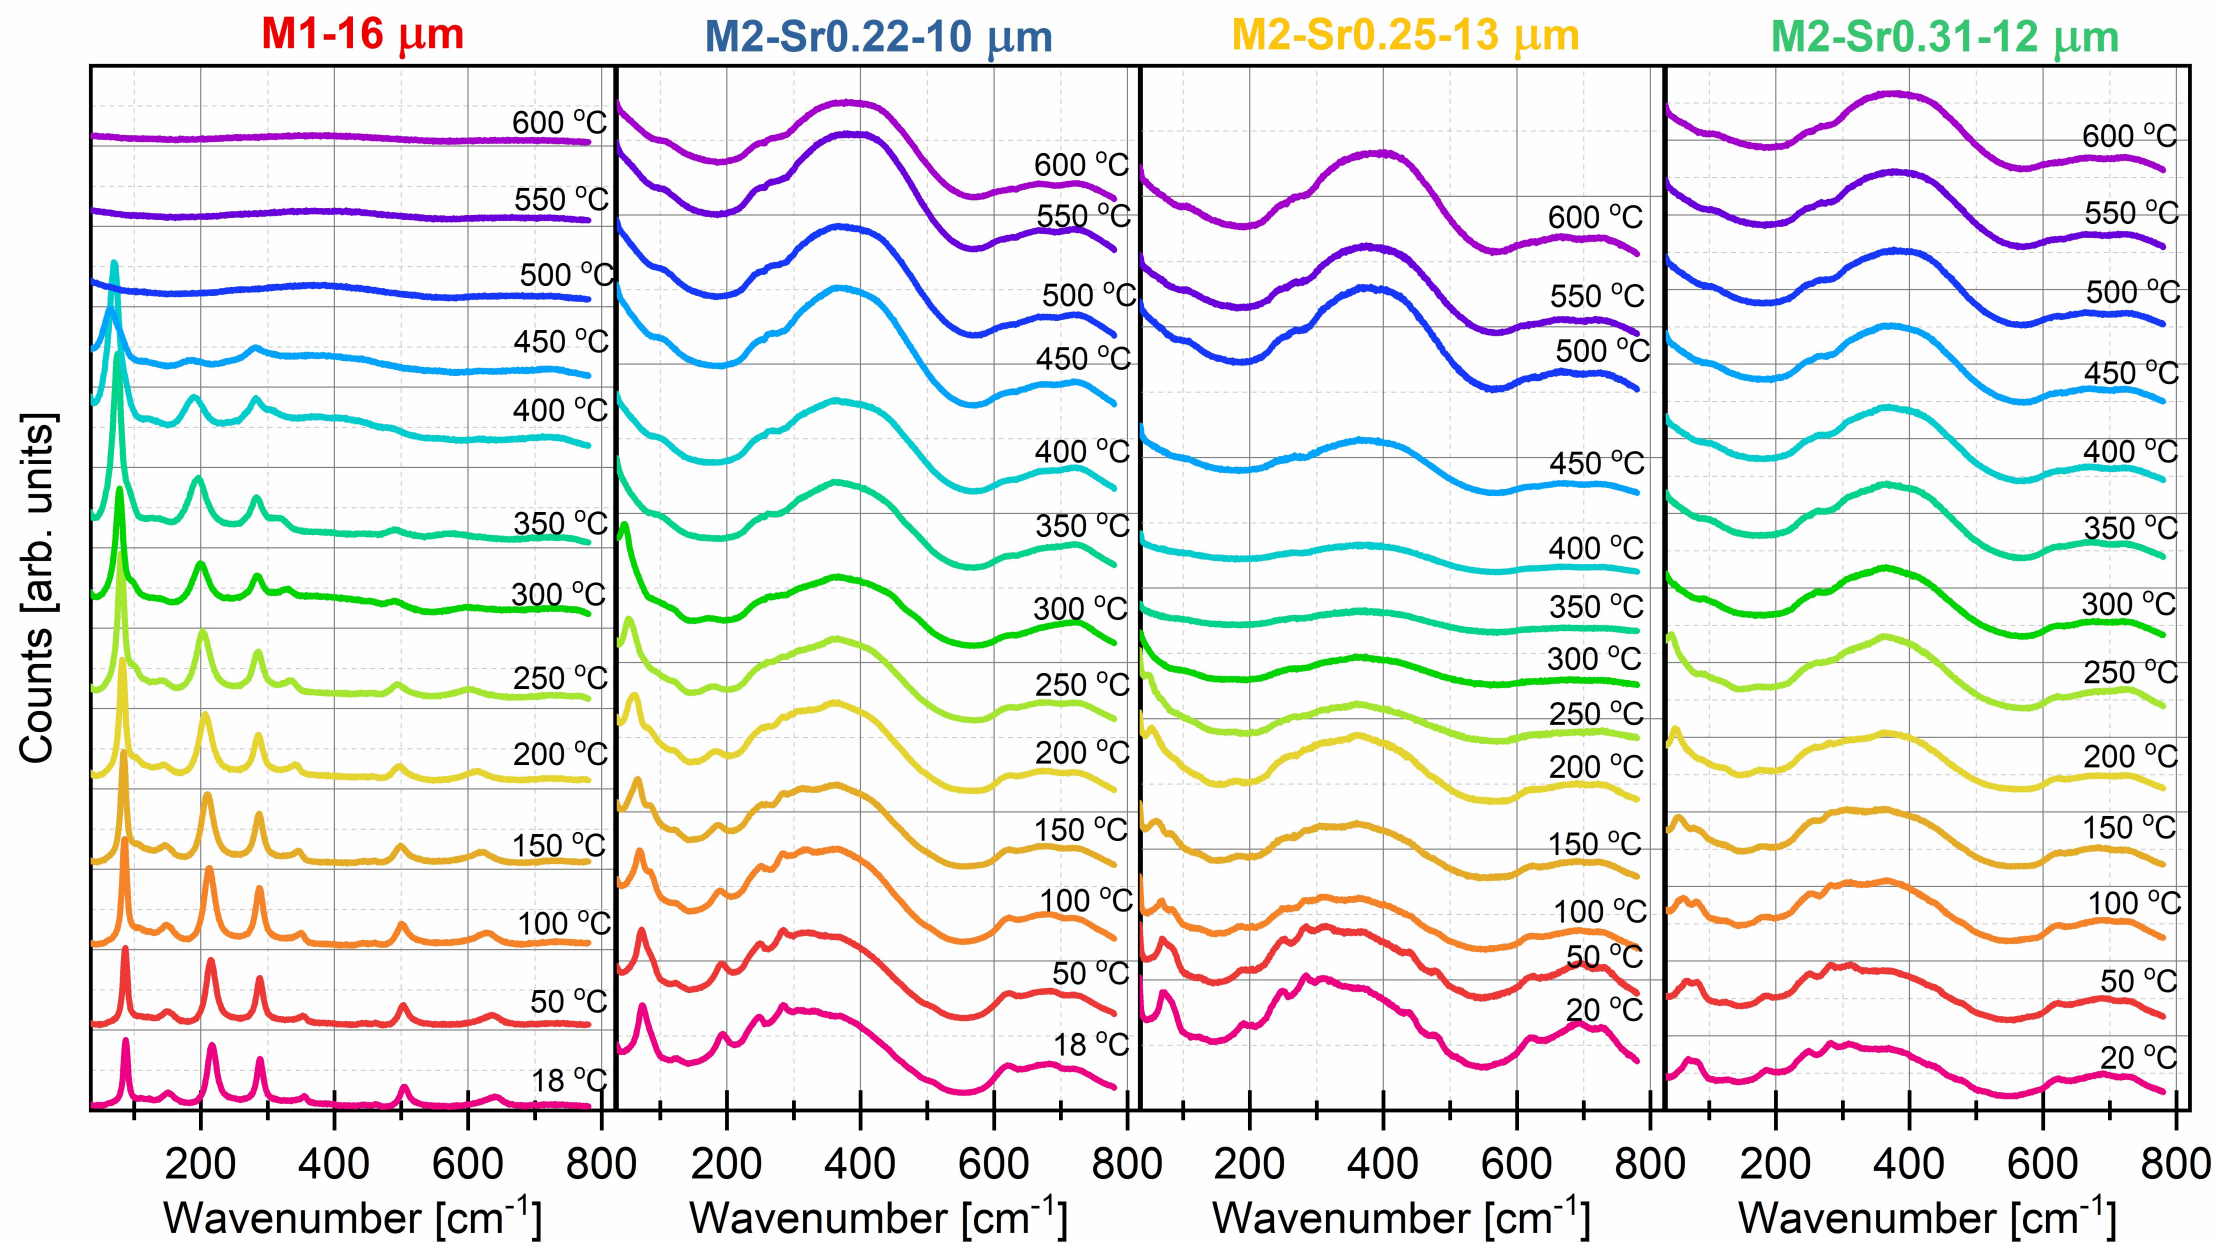

Supplement: d3ce00020f3.pdf [file d3ce00020f3.pdf]

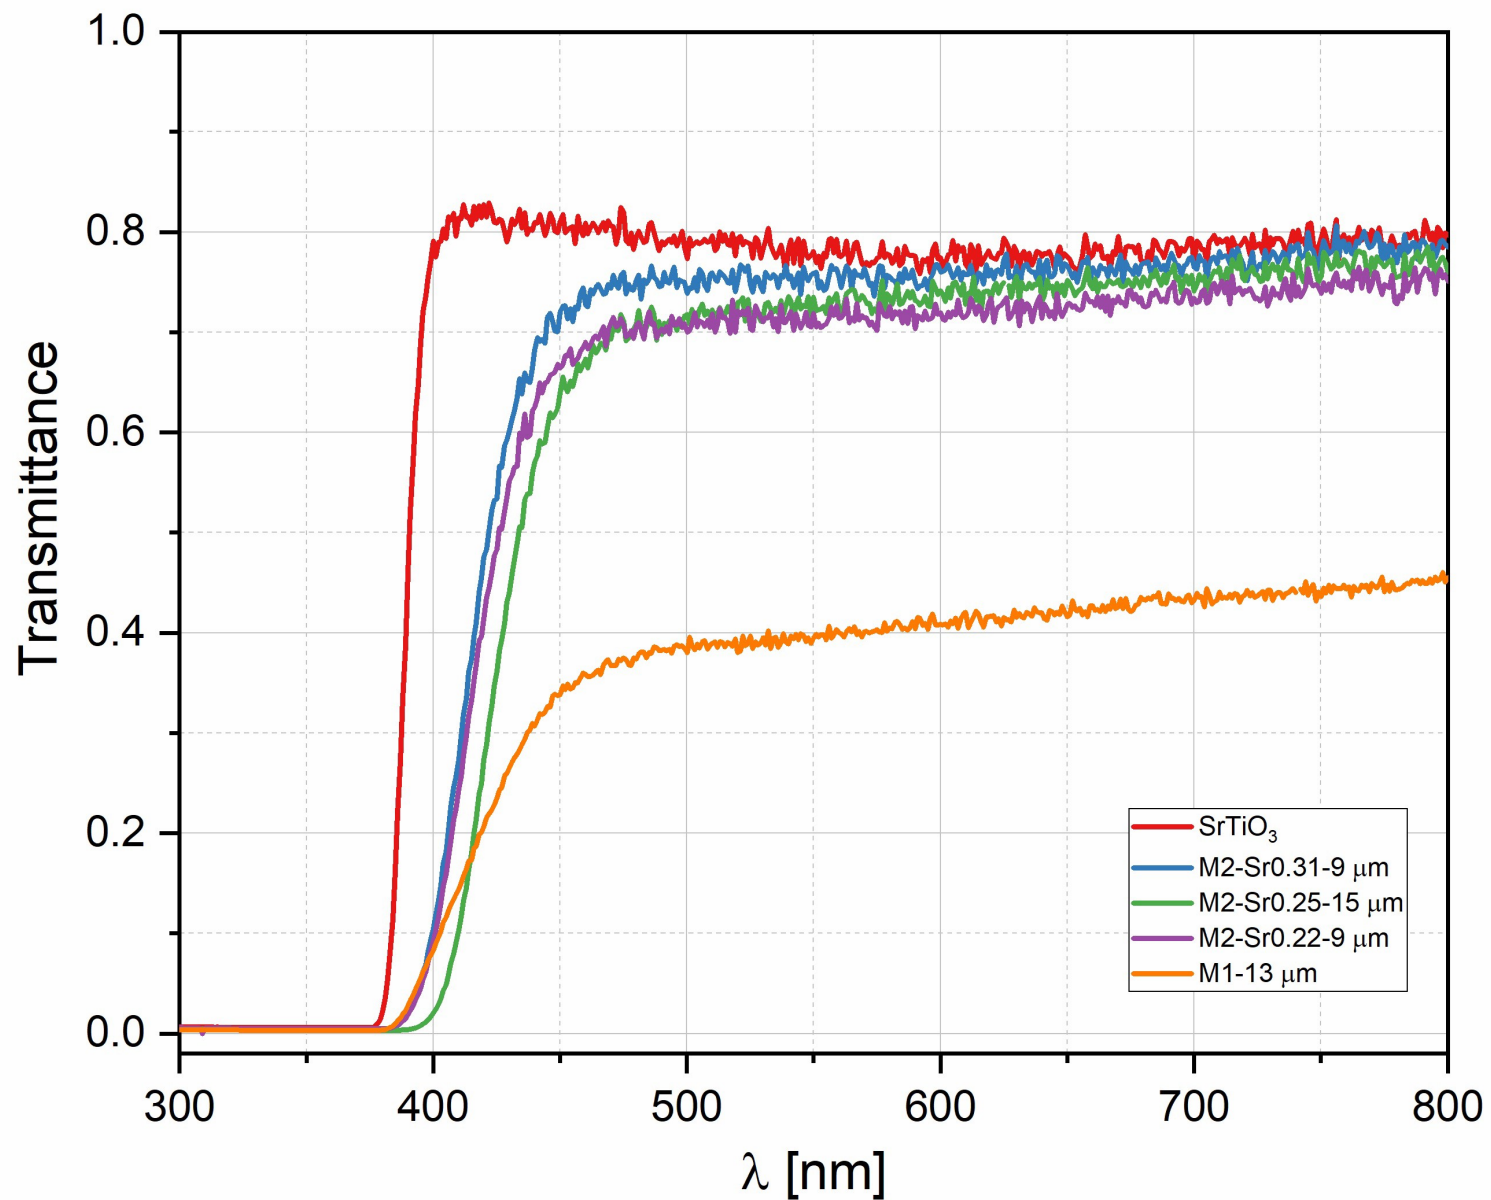

Supplement: d3ce00020f5.pdf [file d3ce00020f5.pdf]

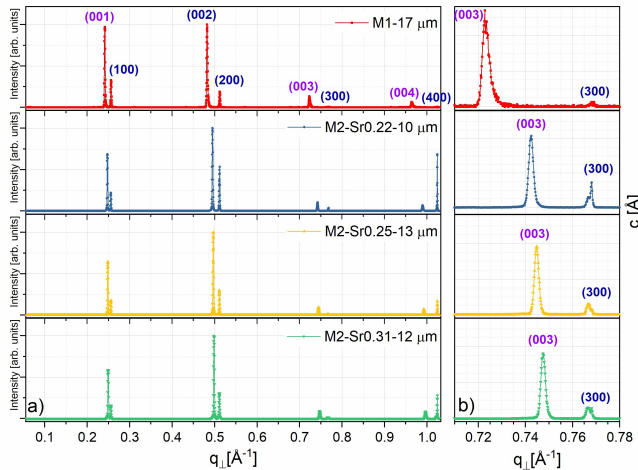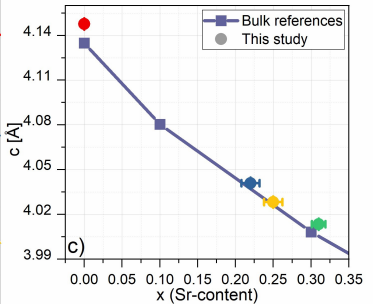

Supplement: d3ce00020f6.pdf [file d3ce00020f6.pdf]
